# Supplementary material
Source: Springer Nature journal article supplement (https://www.springermedizin.de/resource/supplementary/12913_2010_1605_MOESM2_ESM.pdf/9529368)
Supplement: MOESM2 [file 9529368]

Table 4: Result of multiple regression analysis on factors affecting FSW's STI treatment-seeking behaviour (N=296)

| <b>Variables</b>                                                 | <b>No. (%)</b> | <b>Odds Ratio</b> | <b>95% CI</b> | <b>Significance</b> |
|------------------------------------------------------------------|----------------|-------------------|---------------|---------------------|
| <b>1.Age</b>                                                     |                |                   |               |                     |
| Below 25                                                         | 119(63.9)      | 1.00              | 0.830-2.225   | 0.223               |
| Above 25                                                         | 177(74.7)      | 1.359             |               |                     |
| <b>2. Education</b>                                              |                |                   |               |                     |
| Illiterate                                                       | 98(68.8)       | 1.00              | 0.764-1.890   | 0.370               |
| Literate                                                         | 198(70.5)      | 1.202             |               |                     |
| <b>3.Marital status</b>                                          |                |                   |               |                     |
| Never married                                                    | 65(55.6)       | 1.00              |               |                     |
| Separated/divorced/widow                                         | 59(72.8)       | 2.877             | 1.756-4.713   | 0.001               |
| Married                                                          | 172(75.8)      | 2.473             | 1.320-4.634   | 0.005               |
| <b>4. Type of sex workers</b>                                    |                |                   |               |                     |
| Establishment-based                                              | 71(60.7)       | 1.00              | 1.217-3.117   | 0.004               |
| Street-based                                                     | 83(73.1)       | 1.948             |               |                     |
| <b>5.Perceived health worker discrimination in STI treatment</b> |                |                   |               |                     |
| Yes                                                              | 142(67.6)      | 1.00              | 0.540-1.284   | 0.425               |
| No                                                               | 154(71.6)      | 0.833             |               |                     |

OR=Odds Ratio, CI= Confidence Interval
